# Supplementary material for: Comparison of uridine and N1-methylpseudouridine mRNA platforms in development of an Andes virus vaccine
Source: PubMed Central journal article supplement (PMC11289437; doi:10.1038/s41467-024-50774-3), 2024-07-30
Supplement: 41467_2024_50774_MOESM6_ESM.pdf [file 41467_2024_50774_MOESM6_ESM.pdf]

Corresponding author(s): Bukreyev, AlexanderLast updated by author(s): 07/16/2024

## Reporting Summary

Nature Portfolio wishes to improve the reproducibility of the work that we publish. This form provides structure for consistency and transparency in reporting. For further information on Nature Portfolio policies, see our [Editorial Policies](#) and the [Editorial Policy Checklist](#).

### Statistics

For all statistical analyses, confirm that the following items are present in the figure legend, table legend, main text, or Methods section.

n/a Confirmed

- The exact sample size ( $n$ ) for each experimental group/condition, given as a discrete number and unit of measurement
- A statement on whether measurements were taken from distinct samples or whether the same sample was measured repeatedly
- The statistical test(s) used AND whether they are one- or two-sided  
*Only common tests should be described solely by name; describe more complex techniques in the Methods section.*
- A description of all covariates tested
- A description of any assumptions or corrections, such as tests of normality and adjustment for multiple comparisons
- A full description of the statistical parameters including central tendency (e.g. means) or other basic estimates (e.g. regression coefficient) AND variation (e.g. standard deviation) or associated estimates of uncertainty (e.g. confidence intervals)
- For null hypothesis testing, the test statistic (e.g.  $F$ ,  $t$ ,  $r$ ) with confidence intervals, effect sizes, degrees of freedom and  $P$  value noted  
*Give  $P$  values as exact values whenever suitable.*
- For Bayesian analysis, information on the choice of priors and Markov chain Monte Carlo settings
- For hierarchical and complex designs, identification of the appropriate level for tests and full reporting of outcomes
- Estimates of effect sizes (e.g. Cohen's  $d$ , Pearson's  $r$ ), indicating how they were calculated

*Our web collection on [statistics for biologists](#) contains articles on many of the points above.*

### Software and code

Policy information about [availability of computer code](#)

Data collection

Illumina software; BD Accuri C6 Plus; BD LSR Fortessa software; BD FACSAria Fusion sorter

Data analysis

GraphPad Prism v. 9.5; SCANPY; GSEAPY; IMGT/High-V Quest; Flow Jo v. 10. Scripts for analysis of the single-cell RNA-seq and BCR-seq data are available as Jupyter notebooks at [https://github.com/IGlab-VUMC/Andes\\_Virus\\_SC-analysis](https://github.com/IGlab-VUMC/Andes_Virus_SC-analysis).  
Scripts for analysis of the single-cell RNA-seq and BCR-seq data are available as Jupyter notebooks at [https://github.com/IGlab-VUMC/Andes\\_Virus\\_SC-analysis](https://github.com/IGlab-VUMC/Andes_Virus_SC-analysis).

For manuscripts utilizing custom algorithms or software that are central to the research but not yet described in published literature, software must be made available to editors and reviewers. We strongly encourage code deposition in a community repository (e.g. GitHub). See the Nature Portfolio [guidelines for submitting code & software](#) for further information.

### Data

Policy information about [availability of data](#)

All manuscripts must include a [data availability statement](#). This statement should provide the following information, where applicable:

- Accession codes, unique identifiers, or web links for publicly available datasets
- A description of any restrictions on data availability
- For clinical datasets or third party data, please ensure that the statement adheres to our [policy](#)

*The mRNA vaccine construct sequence has been deposited in GenBank under accession number PP784251 [<https://www.ncbi.nlm.nih.gov/nuccore/>]*

term=PP784251]. Reference sequence of ANDV segment M used for the development of mRNA is available in GenBank under accession code NC\_003467 [https://www.ncbi.nlm.nih.gov/nuccore/NC\_003467]; the same virus was used in our in-vitro and in-vivo studies. Sequence of SNV used in the in-vitro studies is available under accession number AF281850 [https://www.ncbi.nlm.nih.gov/nuccore/AF281850]. Single cell sequencing data is available via the Gene Expression Omnibus database (GEO) under accession code GSE240064 [https://www.ncbi.nlm.nih.gov/geo/query/acc.cgi?acc=GSE240064]. Data used for graphs are available in the Source Data file. All other data is available from authors upon request.

## Research involving human participants, their data, or biological material

Policy information about studies with [human participants or human data](#). See also policy information about [sex, gender \(identity/presentation\), and sexual orientation](#) and [race, ethnicity and racism](#).

|                                                                    |                |
|--------------------------------------------------------------------|----------------|
| Reporting on sex and gender                                        | Not applicable |
| Reporting on race, ethnicity, or other socially relevant groupings | Not applicable |
| Population characteristics                                         | Not applicable |
| Recruitment                                                        | Not applicable |
| Ethics oversight                                                   | Not applicable |

Note that full information on the approval of the study protocol must also be provided in the manuscript.

## Field-specific reporting

Please select the one below that is the best fit for your research. If you are not sure, read the appropriate sections before making your selection.

Life sciences  Behavioural & social sciences  Ecological, evolutionary & environmental sciences

For a reference copy of the document with all sections, see [nature.com/documents/nr-reporting-summary-flat.pdf](https://www.nature.com/documents/nr-reporting-summary-flat.pdf)

## Life sciences study design

All studies must disclose on these points even when the disclosure is negative.

|                 |                                                                                                                                                                                                                                                                                                                                                                                                                                                                                                                                                                                                                                                                                                                                                                                                                                                                                                                                                                                                                                                                                                                                                                                                                                                                                                                                                                                                                                                                                                                                                                                                                                                    |
|-----------------|----------------------------------------------------------------------------------------------------------------------------------------------------------------------------------------------------------------------------------------------------------------------------------------------------------------------------------------------------------------------------------------------------------------------------------------------------------------------------------------------------------------------------------------------------------------------------------------------------------------------------------------------------------------------------------------------------------------------------------------------------------------------------------------------------------------------------------------------------------------------------------------------------------------------------------------------------------------------------------------------------------------------------------------------------------------------------------------------------------------------------------------------------------------------------------------------------------------------------------------------------------------------------------------------------------------------------------------------------------------------------------------------------------------------------------------------------------------------------------------------------------------------------------------------------------------------------------------------------------------------------------------------------|
| Sample size     | <p>For in-vitro studies, biological replicates were used as the minimum suitable for statistical comparisons. Deviations in these triplicates were limited and statistical support significant.</p> <p>Syrian hamsters demonstrate 100% mortality when infected with high doses of ANDV. This is what we expect in our control group. However, vaccine efficiency may vary, particularly depending on dose and regimen of administration. Group sample sizes of 5 in experimental and control groups achieve 83% power to detect a difference between the group proportions of 0.849. The proportion in the treatment group is assumed to be 0.001 under the null hypothesis and 0.85 under the alternative hypothesis. The proportion in the control group is 0.001. The test statistic used is the two-sided Fisher's Exact Test. The significance level of the test is targeted at 0.05.</p> <p>For the mouse study of GC development, group sample sizes of 9 achieve 89.29% power to reject the null hypothesis of equal means when the population mean difference is <math>\mu_1 - \mu_2 = 1.6 - 0 = 1.6</math> with a standard deviation for both groups of 1 and with a significance level (alpha) of 0.05 using a two-sided equal-variance t-test.</p> <p>For B-cell repertoire sequencing we used mice with group size of 4, mainly because of very high costs of this study. At 95% confidence level (2-tailed unpaired T-test) a sample size of 4 animals per group at each time point will provide greater than 80% power to detect an increase in mean of the log transformed measure of 2 assuming a standard deviation of 0.8.</p> |
| Data exclusions | No data were excluded.                                                                                                                                                                                                                                                                                                                                                                                                                                                                                                                                                                                                                                                                                                                                                                                                                                                                                                                                                                                                                                                                                                                                                                                                                                                                                                                                                                                                                                                                                                                                                                                                                             |
| Replication     | All experiments were done in biological triplicates as the minimum, or on groups of 4 to 18 animals. Some of the animal studies were done as 2-3 independent identical experiments (to limit animal number per each experiment to make it doable). Electron microscopy experiment was performed twice. The details are provided in figure captions. All results were reproducible, as also demonstrated by statistical analysis.                                                                                                                                                                                                                                                                                                                                                                                                                                                                                                                                                                                                                                                                                                                                                                                                                                                                                                                                                                                                                                                                                                                                                                                                                   |
| Randomization   | The animals were randomly assigned to experimental groups.                                                                                                                                                                                                                                                                                                                                                                                                                                                                                                                                                                                                                                                                                                                                                                                                                                                                                                                                                                                                                                                                                                                                                                                                                                                                                                                                                                                                                                                                                                                                                                                         |
| Blinding        | No blinding was implemented.                                                                                                                                                                                                                                                                                                                                                                                                                                                                                                                                                                                                                                                                                                                                                                                                                                                                                                                                                                                                                                                                                                                                                                                                                                                                                                                                                                                                                                                                                                                                                                                                                       |

## Behavioural & social sciences study design

All studies must disclose on these points even when the disclosure is negative.

|                   |                 |
|-------------------|-----------------|
| Study description | Not applicable. |
| Research sample   | Not applicable. |
| Sampling strategy | Not applicable. |

|                   |                 |
|-------------------|-----------------|
| Data collection   | Not applicable. |
| Timing            | Not applicable. |
| Data exclusions   | Not applicable. |
| Non-participation | Not applicable. |
| Randomization     | Not applicable. |

## Ecological, evolutionary & environmental sciences study design

All studies must disclose on these points even when the disclosure is negative.

|                          |                 |
|--------------------------|-----------------|
| Study description        | Not applicable. |
| Research sample          | Not applicable. |
| Sampling strategy        | Not applicable. |
| Data collection          | Not applicable. |
| Timing and spatial scale | Not applicable. |
| Data exclusions          | Not applicable. |
| Reproducibility          | Not applicable. |
| Randomization            | Not applicable. |
| Blinding                 | Not applicable. |

Did the study involve field work?  Yes  No

## Field work, collection and transport

|                        |                 |
|------------------------|-----------------|
| Field conditions       | Not applicable. |
| Location               | Not applicable. |
| Access & import/export | Not applicable. |
| Disturbance            | Not applicable. |

## Reporting for specific materials, systems and methods

We require information from authors about some types of materials, experimental systems and methods used in many studies. Here, indicate whether each material, system or method listed is relevant to your study. If you are not sure if a list item applies to your research, read the appropriate section before selecting a response.

### Materials & experimental systems

| n/a                                 | Involved in the study                                           |
|-------------------------------------|-----------------------------------------------------------------|
| <input type="checkbox"/>            | <input checked="" type="checkbox"/> Antibodies                  |
| <input type="checkbox"/>            | <input checked="" type="checkbox"/> Eukaryotic cell lines       |
| <input checked="" type="checkbox"/> | <input type="checkbox"/> Palaeontology and archaeology          |
| <input type="checkbox"/>            | <input checked="" type="checkbox"/> Animals and other organisms |
| <input checked="" type="checkbox"/> | <input type="checkbox"/> Clinical data                          |
| <input checked="" type="checkbox"/> | <input type="checkbox"/> Dual use research of concern           |
| <input checked="" type="checkbox"/> | <input type="checkbox"/> Plants                                 |

### Methods

| n/a                                 | Involved in the study                              |
|-------------------------------------|----------------------------------------------------|
| <input checked="" type="checkbox"/> | <input type="checkbox"/> ChIP-seq                  |
| <input type="checkbox"/>            | <input checked="" type="checkbox"/> Flow cytometry |
| <input checked="" type="checkbox"/> | <input type="checkbox"/> MRI-based neuroimaging    |

## Antibodies

### Antibodies used

Experimental antibodies ANDV-4, -5, -12, -22, -23, -34, and -44 targeting ANDV Gn/Gc, were used to detect expression of ANDV glycoprotein by flow cytometry. These were described previously, doi: 10.1016/j.celrep.2021.109453. Anti-mouse antibodies used for cell sorting prior to the GC analysis and single cell sequencing were sourced from Biolegend and Beckton Dickenson. These included: 11-26c.a2 (IgD), 281-2 (CD138), RA3-6B2 (B220), GL7 (GL7), 90 (CD38), GL-1 (CD86), 1.27F12 (CXCR4), GK1.5 (CD4), 53-6.7 (CD8), LI38D7 (CXCR5), 29F.1A12 (PD-1), and MF-14 (FoxP3). Details on antibodies are present in Table S3.

### Validation

The ANDV antibodies were described previously, doi: 10.1016/j.celrep.2021.109453. In our assays, the only validation was staining of mock-transfected cells with these antibodies. No validation was performed for the commercially available anti-mouse antibodies used for cell sorting prior to GC evaluation and single cell sequencing except that beads with corresponding fluorophores were used for laser signal adjustments.

## Eukaryotic cell lines

Policy information about [cell lines and Sex and Gender in Research](#)

### Cell line source(s)

Vero E6 (ATCC #CRL-1586), A549 (ATCC # CCL-185), 293T (ATCC # CRL-3216).

### Authentication

None of the cell lines used were authenticated.

### Mycoplasma contamination

All cell lines tested negative for mycoplasma contamination

### Commonly misidentified lines (See [ICLAC](#) register)

Not applicable.

## Palaeontology and Archaeology

### Specimen provenance

Not applicable.

### Specimen deposition

Not applicable.

### Dating methods

Not applicable.

Tick this box to confirm that the raw and calibrated dates are available in the paper or in Supplementary Information.

### Ethics oversight

Not applicable.

Note that full information on the approval of the study protocol must also be provided in the manuscript.

## Animals and other research organisms

Policy information about [studies involving animals](#); [ARRIVE guidelines](#) recommended for reporting animal research, and [Sex and Gender in Research](#)

### Laboratory animals

Mice C57Bl6/J (10-12 weeks-old; The Jackson Laboratory), BALB/c (10 weeks-old; The Jackson Laboratory), golden Syrian hamsters (10 weeks-old; Charles River)

### Wild animals

Not applicable.

### Reporting on sex

Females only were used to avoid unwanted breeding during the experiment and excessive fighting of males. For the sample size used, no sex-related differences were anticipated.

### Field-collected samples

Not applicable.

### Ethics oversight

UTMB IACUC

Note that full information on the approval of the study protocol must also be provided in the manuscript.

## Clinical data

Policy information about [clinical studies](#)

All manuscripts should comply with the ICMJE [guidelines for publication of clinical research](#) and a completed [CONSORT checklist](#) must be included with all submissions.

### Clinical trial registration

Not applicable.

|                 |                                              |
|-----------------|----------------------------------------------|
| Study protocol  | <input type="text" value="Not applicable."/> |
| Data collection | <input type="text" value="Not applicable."/> |
| Outcomes        | <input type="text" value="Not applicable."/> |

## Dual use research of concern

Policy information about [dual use research of concern](#)

### Hazards

Could the accidental, deliberate or reckless misuse of agents or technologies generated in the work, or the application of information presented in the manuscript, pose a threat to:

| No                                  | Yes                                                 |
|-------------------------------------|-----------------------------------------------------|
| <input checked="" type="checkbox"/> | <input type="checkbox"/> Public health              |
| <input checked="" type="checkbox"/> | <input type="checkbox"/> National security          |
| <input checked="" type="checkbox"/> | <input type="checkbox"/> Crops and/or livestock     |
| <input checked="" type="checkbox"/> | <input type="checkbox"/> Ecosystems                 |
| <input checked="" type="checkbox"/> | <input type="checkbox"/> Any other significant area |

### Experiments of concern

Does the work involve any of these experiments of concern:

| No                                  | Yes                                                                                                  |
|-------------------------------------|------------------------------------------------------------------------------------------------------|
| <input checked="" type="checkbox"/> | <input type="checkbox"/> Demonstrate how to render a vaccine ineffective                             |
| <input checked="" type="checkbox"/> | <input type="checkbox"/> Confer resistance to therapeutically useful antibiotics or antiviral agents |
| <input checked="" type="checkbox"/> | <input type="checkbox"/> Enhance the virulence of a pathogen or render a nonpathogen virulent        |
| <input checked="" type="checkbox"/> | <input type="checkbox"/> Increase transmissibility of a pathogen                                     |
| <input checked="" type="checkbox"/> | <input type="checkbox"/> Alter the host range of a pathogen                                          |
| <input checked="" type="checkbox"/> | <input type="checkbox"/> Enable evasion of diagnostic/detection modalities                           |
| <input checked="" type="checkbox"/> | <input type="checkbox"/> Enable the weaponization of a biological agent or toxin                     |
| <input checked="" type="checkbox"/> | <input type="checkbox"/> Any other potentially harmful combination of experiments and agents         |

## Plants

|                       |                                              |
|-----------------------|----------------------------------------------|
| Seed stocks           | <input type="text" value="Not applicable."/> |
| Novel plant genotypes | <input type="text" value="Not applicable."/> |
| Authentication        | <input type="text" value="Not applicable."/> |

## ChIP-seq

### Data deposition

- Confirm that both raw and final processed data have been deposited in a public database such as [GEO](#).
- Confirm that you have deposited or provided access to graph files (e.g. BED files) for the called peaks.

|                                                             |                                              |
|-------------------------------------------------------------|----------------------------------------------|
| Data access links<br>May remain private before publication. | <input type="text" value="Not applicable."/> |
| Files in database submission                                | <input type="text" value="Not applicable."/> |
| Genome browser session<br>(e.g. <a href="#">UCSC</a> )      | <input type="text" value="Not applicable."/> |

### Methodology

|            |                                              |
|------------|----------------------------------------------|
| Replicates | <input type="text" value="Not applicable."/> |
|------------|----------------------------------------------|

|                         |                 |
|-------------------------|-----------------|
| Sequencing depth        | Not applicable. |
| Antibodies              | Not applicable. |
| Peak calling parameters | Not applicable. |
| Data quality            | Not applicable. |
| Software                | Not applicable. |

## Flow Cytometry

### Plots

Confirm that:

- The axis labels state the marker and fluorochrome used (e.g. CD4-FITC).
- The axis scales are clearly visible. Include numbers along axes only for bottom left plot of group (a 'group' is an analysis of identical markers).
- All plots are contour plots with outliers or pseudocolor plots.
- A numerical value for number of cells or percentage (with statistics) is provided.

### Methodology

Sample preparation

1. *In-vitro* evaluation of ANDV glycoprotein expression. Cells transfected with ANDV U-mRNA or m1Ψ-mRNA in 24-well plate format were digested in 0.25 ml of 0.25% trypsin-EDTA (Gibco) which was further neutralized by an addition of 0.25 ml of calf serum (Corning). Cells were washed by PBS, fixed in 4% paraformaldehyde (Polysciences, Inc), and subjected to immunostaining with a cocktail of human monoclonal antibodies ANDV-4, -5, -12, -22, -23, -34, and -44 targeting ANDV Gn/Gc and capable to both bind and neutralize the virus 10 diluted to 2 µg/ml in StartingBlock T 20 (TBS) Blocking Buffer (Thermo Scientific). After incubation during 1 h at room temperature and two PBS washes, cells were incubated with the secondary goat anti-human FITC-conjugated antibody (Southern Biotech) diluted 1:500 in TBS and incubated at the same conditions in the dark. Stained cells were double-washed in PBS and subjected to flow cytometry on Accuri C6.

2. GC analysis: Cells from inguinal and popliteal lymph nodes were pooled for each mouse. Cells were counted, Fc blocked, and stained with indicated monoclonal antibodies that were commercially sourced (Biolegend and Beckton Dickinson). Key antibody clones used were: 11-26c.a2 (IgD), 281-2 (CD138), RA3-6B2 (B220), GL7 (GL7), 90 (CD38), GK1.5 (CD4), 53-6.7 (CD8). Cells were acquired on a BD LSR Fortessa.

Instrument

BD Accuri C6; BD LSR Fortessa.

Software

BD Accuri C6 Plus; BD LSR Fortessa; Flow Jo v.10.

Cell population abundance

Relative frequencies of GC populations are reported (e.g. of total live B cells). Absolute counts of live lymphocytes for each sample were manually determined, enabling total cell numbers to be calculated. For cell sorting experiments, due to limited sample available post sort and the 10x genomics workflow a direct purity check was not feasible. The cell sorter was quality control checked using CST and Accudrop beads and was shown to be highly stable. The sequencing data confirmed that the sorted cells were indeed GC B cells by upregulation of prototypical GC B cell genes (e.g. *aicda*).

Gating strategy

Germinal center (GC) B cells were gated using well established conventional markers that are expressed by GC B cells. The population was obvious and had clear separation from non-GC B cells. GC B cells were gated as single live lymphocytes (FSC-A vs SSC-A and SSC-A vs H) that are B220+, CD4-, CD8-, GL7+, CD38-, IgD-, CD138- and purified by cell sorting using the BD FACSAria Fusion sorter (Beckton Dickinson, Inc).

- Tick this box to confirm that a figure exemplifying the gating strategy is provided in the Supplementary Information.

## Magnetic resonance imaging

### Experimental design

Design type

Indicate task or resting state; event-related or block design.

Design specifications

Specify the number of blocks, trials or experimental units per session and/or subject, and specify the length of each trial or block (if trials are blocked) and interval between trials.

Behavioral performance measures

State number and/or type of variables recorded (e.g. correct button press, response time) and what statistics were used to establish that the subjects were performing the task as expected (e.g. mean, range, and/or standard deviation across subjects).

## Acquisition

Imaging type(s)

Field strength

Sequence & imaging parameters

Area of acquisition

Diffusion MRI  Used  Not used

## Preprocessing

Preprocessing software

Normalization

Normalization template

Noise and artifact removal

Volume censoring

## Statistical modeling & inference

Model type and settings

Effect(s) tested

Specify type of analysis:  Whole brain  ROI-based  Both

Statistic type for inference

(See [Eklund et al. 2016](#))

Correction

## Models & analysis

n/a | Involved in the study

Functional and/or effective connectivity

Graph analysis

Multivariate modeling or predictive analysis

Functional and/or effective connectivity

Graph analysis

Multivariate modeling and predictive analysis
